# Supplementary material for: Respiratory and limb muscles’ ability to repeatedly generate maximal isometric strength in patients with intensive care unit-acquired weakness: an observational study
Source: Springer Nature journal article supplement (doi:10.1186/s12871-025-03008-y), 2025-03-20
Supplement: MOESM1 [file 12871_2025_3008_MOESM1_ESM.pdf]

**Respiratory and limb muscles' ability to repeatedly generate maximal force in patients with intensive care unit-acquired weakness: an observational study**

Margaux MACHEFERT, Guillaume PRIEUR, Solène AUBRY, Yann COMBRET, Clément MEDRINAL

**Supplemental material**

# Supplemental Figures

**e-Figure1.** Muscle force time course evolution over the ten repetitions, with individual data expressed for both muscle groups in % of first contraction.

**e-Figure2.** Muscle force time course evolution over the ten repetitions, with individual data expressed in unit of force, centimeter of water (cmH<sub>2</sub>O) for Pimax and Newtons (N) for quadriceps muscle maximal strength.

**e-Figure3.** Muscle force time course evolution over the ten repetitions according to time delay between extubation and measurements, with data expressed for both muscle groups in % of first contraction. Panel A: for quadriceps muscle; Panel B: for inspiratory muscles.

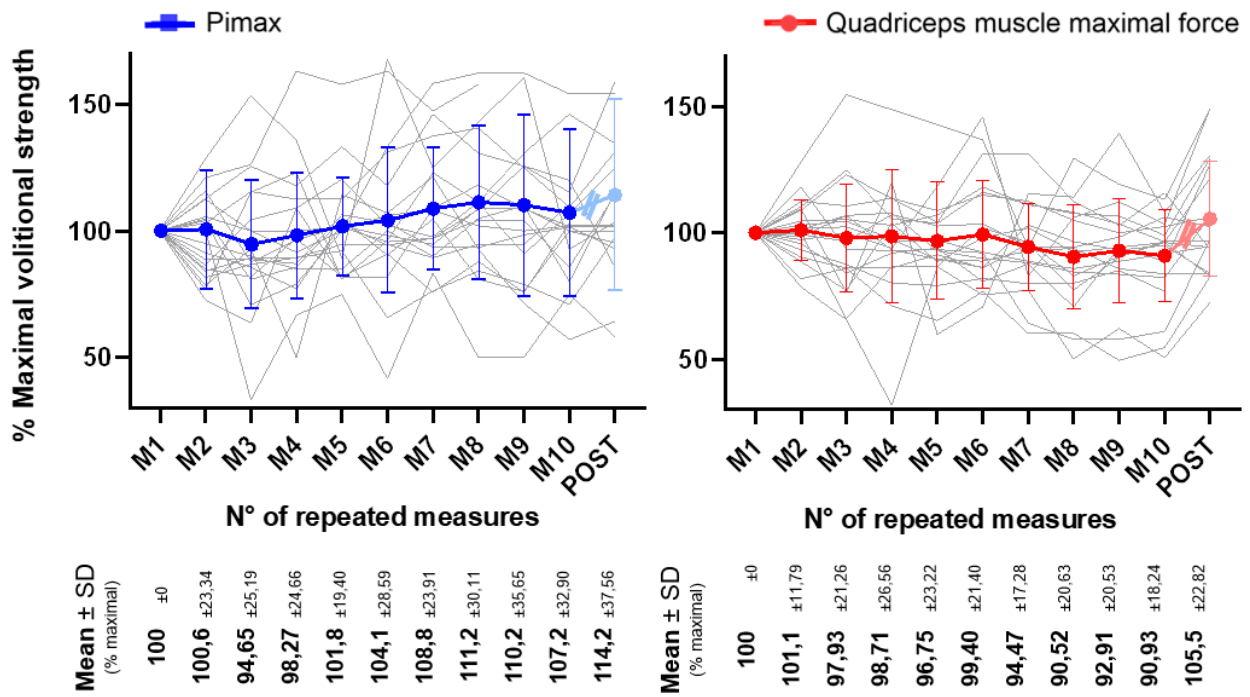

e-Figure1. Muscle force time course evolution over the ten repetitions, with individual data expressed for both muscle groups in % of first contraction. SD: standard deviation.

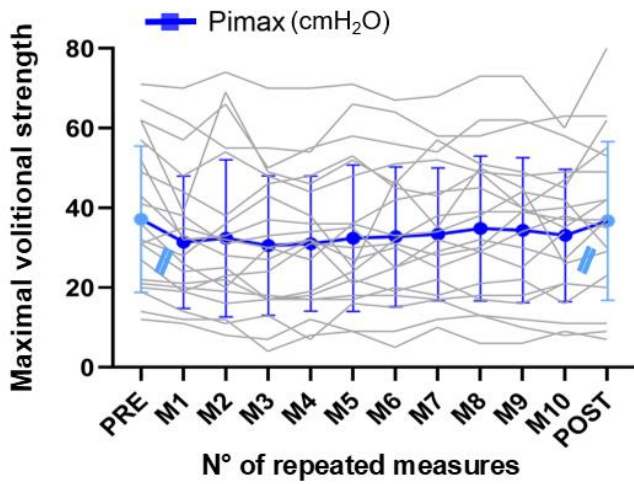

| Mean ± SD (cmH <sub>2</sub> O) |
|--------------------------------|
| 38,45 ±18,54                   |
| 32,60 ±16,77                   |
| 33,60 ±19,92                   |
| 31,75 ±17,65                   |
| 32,25 ±17,09                   |
| 33,65 ±18,55                   |
| 34,00 ±17,71                   |
| 34,65 ±16,79                   |
| 36,10 ±18,35                   |
| 35,65 ±18,37                   |
| 34,35 ±16,76                   |
| 38,00 ±20,10                   |

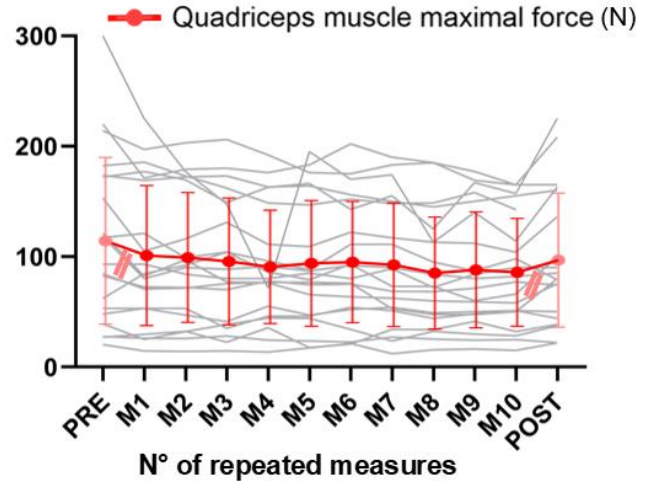

| Mean ± SD (Newton) |
|--------------------|
| 118,6 ±75,24       |
| 101,7 ±64,39       |
| 99,95 ±59,64       |
| 96,40 ±58,26       |
| 91,38 ±52,12       |
| 94,59 ±57,83       |
| 95,79 ±55,77       |
| 93,24 ±56,78       |
| 85,72 ±51,46       |
| 88,52 ±53,37       |
| 86,29 ±49,62       |
| 97,61 ±61,57       |

**e-Figure2. Muscle force time course evolution over the ten repetitions, with individual data expressed in unit of force, centimeter of water (cmH<sub>2</sub>O) for Pimax and Newtons (N) for quadriceps muscle maximal strength. SD: standard deviation.**

## A Quadriceps muscle force evolution according to time delay

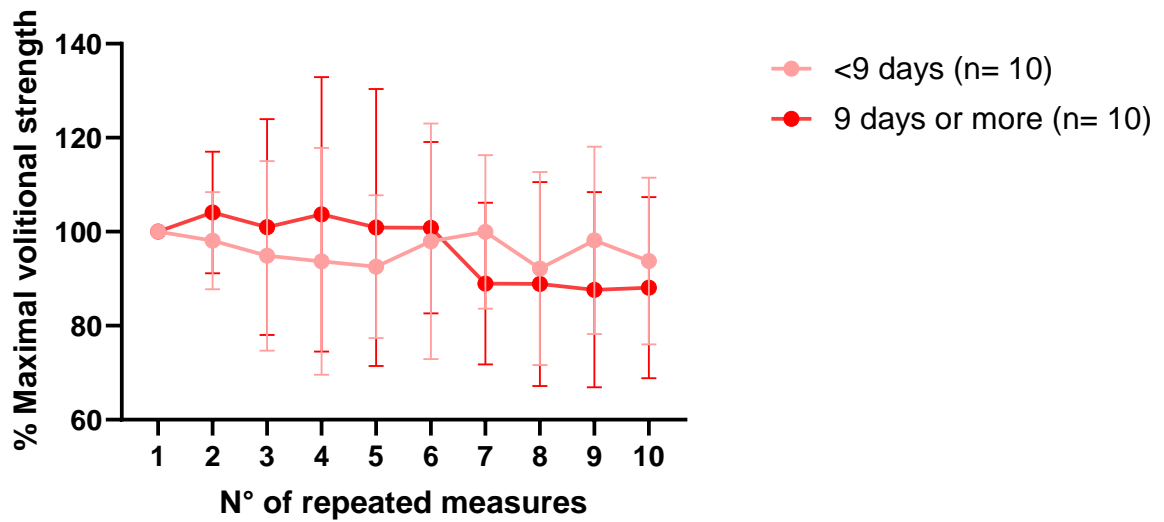

## B Inspiratory muscles force according to time delay

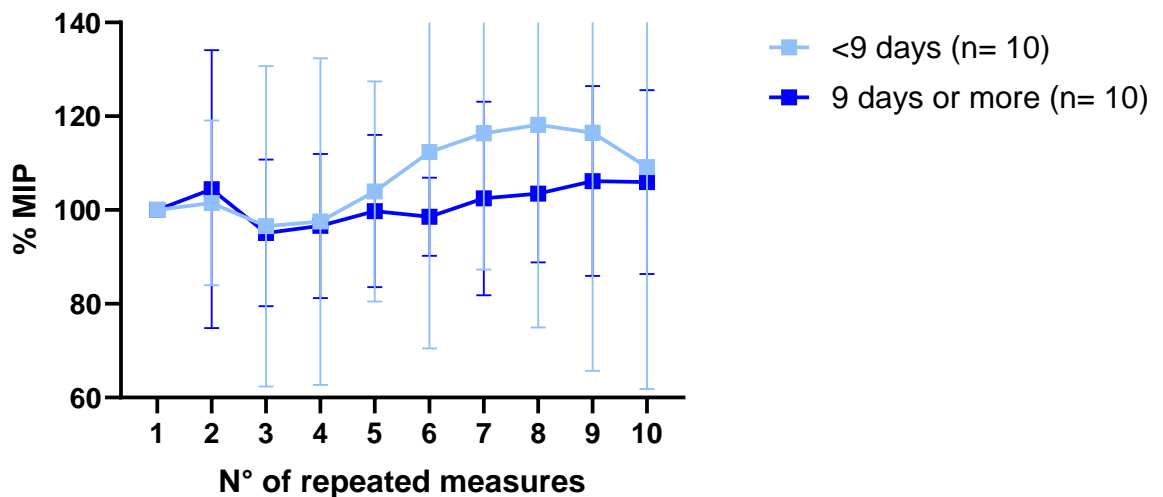

**e-Figure3. Muscle force time course evolution over the ten repetitions according to time delay between extubation and measurements, with data expressed for both muscle groups in % of first contraction. Panel A: for quadriceps muscle; Panel B: for inspiratory muscles. \* Indicates statistically significant between-group differences.**
